# Supplementary material
Source: HighWire-hosted journal article supplement (http://www.qdcxjkg.com/highwire/filestream/113741/field_highwire_adjunct_files/0/Supplementary_material_rev.pdf)
Supplement: Supplementary_material_rev.pdf [file Supplementary_material_rev.pdf]

Multicentre time-series studies of short-term effects of air pollution on respiratory health in Europe (APHEA-2).

| Air pollutant    | Reference                    | Number of cities | Population | Mean daily pollutant concentration range ( $\mu\text{g}/\text{m}^3$ ) <sup>o</sup> | EU limit values ( $\mu\text{g}/\text{m}^3$ ) <sup>o</sup> | Health indicator    | % change per 10 $\mu\text{g}/\text{m}^3$ (95% CI) | Lag      |
|------------------|------------------------------|------------------|------------|------------------------------------------------------------------------------------|-----------------------------------------------------------|---------------------|---------------------------------------------------|----------|
| PM10             | Analitis 2006 [33]           | 21               | All ages   | 14-69                                                                              | 50                                                        | Respiratory deaths  | 0.6% (0.2 to 0.95%)                               | Lag 0-1  |
|                  | Zanobetti 2003 [35]          | 10               | All ages   | 15.5-76.2                                                                          |                                                           | Respiratory deaths  | 4.2% (1.1 to 7.4%)                                | Lag 0-40 |
|                  | Atkinson 2001, 2004 [38, 39] | 8                | 0-14 yr    |                                                                                    | Asthma admissions                                         | 1.5% (0.1 to 2.8%)  | Lag 0-1                                           |          |
|                  |                              |                  | 15-64 yr   |                                                                                    | Asthma admissions                                         | 1.0% (0.3 to 1.8%)  |                                                   |          |
| 65+ yr           |                              |                  |            | COPD plus asthma admissions                                                        | 1.0% (0.6 to 1.4%)                                        |                     |                                                   |          |
|                  |                              | 65+ yr           |            | Respiratory admissions                                                             | 1.0% (0.7 to 1.3%)                                        |                     |                                                   |          |
| Black smoke      | Analitis 2006 [33]           | 15               | All ages   | 14-166                                                                             | 80                                                        | Respiratory deaths  | 0.8% (0.1 to 1.6%)                                | Lag 0-1  |
| O <sub>3</sub> * | Gryparis 2004 [34]           | 23               | All ages   | 30-99                                                                              | 120                                                       | Respiratory deaths  | 1.1% (0.7 to 1.5%)                                | Lag 0-1  |
|                  | Samoli 2009 [36]             | 21               | All ages   | 39.2-123.2                                                                         |                                                           |                     | 0.4% (0.1 to 0.7%)                                | Lag 0-1  |
|                  |                              |                  |            |                                                                                    |                                                           |                     | 3.4% (1.9 to 4.8%)                                | Lag 0-20 |
| SO <sub>2</sub>  | Sunyer 2003 [37]             | 7                | 0-14 yr    | 6.8-32.5                                                                           | 125                                                       | Asthma admissions   | 1.3% (0.4 to 2.2%)                                | Lag 0-1  |
|                  |                              |                  | 15-64 yr   |                                                                                    | Asthma admissions                                         | 0.0% (-0.9 to 1.0%) |                                                   |          |
|                  |                              |                  | 65+ yr     |                                                                                    | COPD plus asthma admissions                               | 0.6% (0.0 to 1.2%)  |                                                   |          |
|                  |                              |                  | 65+ yr     |                                                                                    | Respiratory admissions                                    | 0.5% (0.1 to 0.9%)  |                                                   |          |
| NO <sub>2</sub>  | Samoli 2006 [32]             | 30               | All ages   | 46.2-154.8                                                                         | 200                                                       | Respiratory deaths  | 0.4% (0.3 to 0.6%)                                | Lag 0-1  |

<sup>o</sup>PM10, SO<sub>2</sub>: 24-hour mean, O<sub>3</sub>: maximum daily 8-h mean, NO<sub>2</sub>: 1-hour mean, (Source: <http://ec.europa.eu/environment/air/quality/standards.htm>) Black smoke: annual (median of daily mean values) (Source: EU Council Directive 80/779/EEC)

\*during the warm season

n.a.: not available
